# Supplementary material for: Optical and electrical properties of colloidal (spherical Au)-(spinel ferrite nanorod) heterostructures
Source: Royal Society of Chemistry journal article supplement (doi:10.1039/c1nr10768b), 2011-01-01
Supplement: c1nr10768b.pdf [file c1nr10768b.pdf]

## Optical and Electrical Properties of Colloidal (spherical Au)-(Spinel Ferrite nanorod) heterostructures

Chandramohan George<sup>§</sup>, Alessandro Genovese<sup>§</sup>, Fen Qiao<sup>§</sup>, Kseniya Korobchevskaya<sup>§</sup>, Alberto Comin<sup>§</sup>, Andrea Falqui<sup>§</sup>, Sergio Marras<sup>§</sup>, Anna Roig,<sup>&</sup> Yang Zhang<sup>§</sup>, Roman Krahne<sup>§</sup> and Liberato Manna<sup>§\*</sup>

<sup>§</sup>Istituto Italiano di Tecnologia, Via Morego 30, 16163 Genova, Italy

<sup>&</sup>Institut de Ciència de Materials de Barcelona (ICMAB-CSIC), Campus de la UAB, 08193 Bellaterra, Spain

Corresponding author: [liberato.manna@iit.it](mailto:liberato.manna@iit.it)

Supporting information

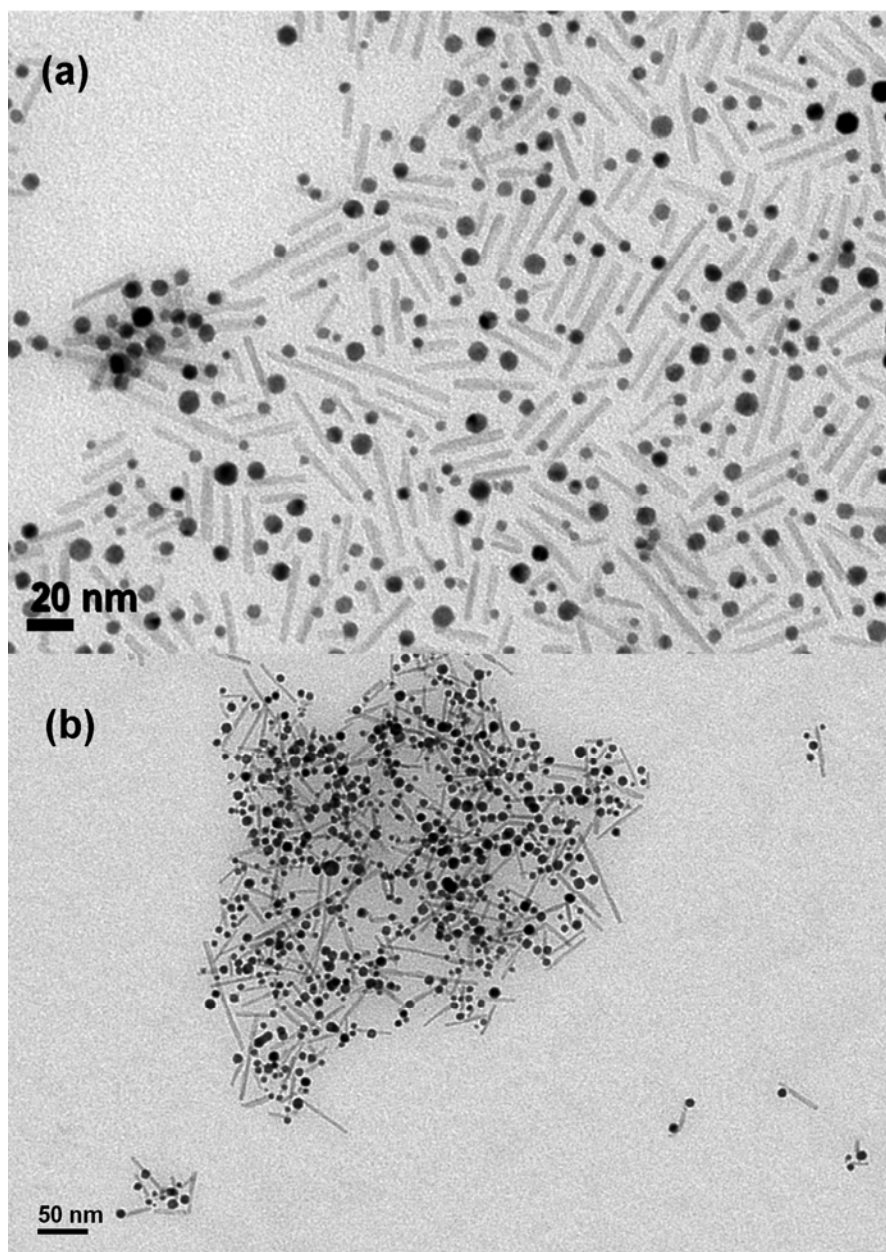

**Figure S1.** TEM image showing the earliest stages of the growth of the Au-Fe<sub>x</sub>O<sub>y</sub> heterostructures (HSs). The Fe<sub>x</sub>O<sub>y</sub> section on each Au nanoparticle is already evident aliquots taken after (a) less than 5 seconds and (b) 2 min from the start of the reaction of Fe(CO)<sub>5</sub> on Au.

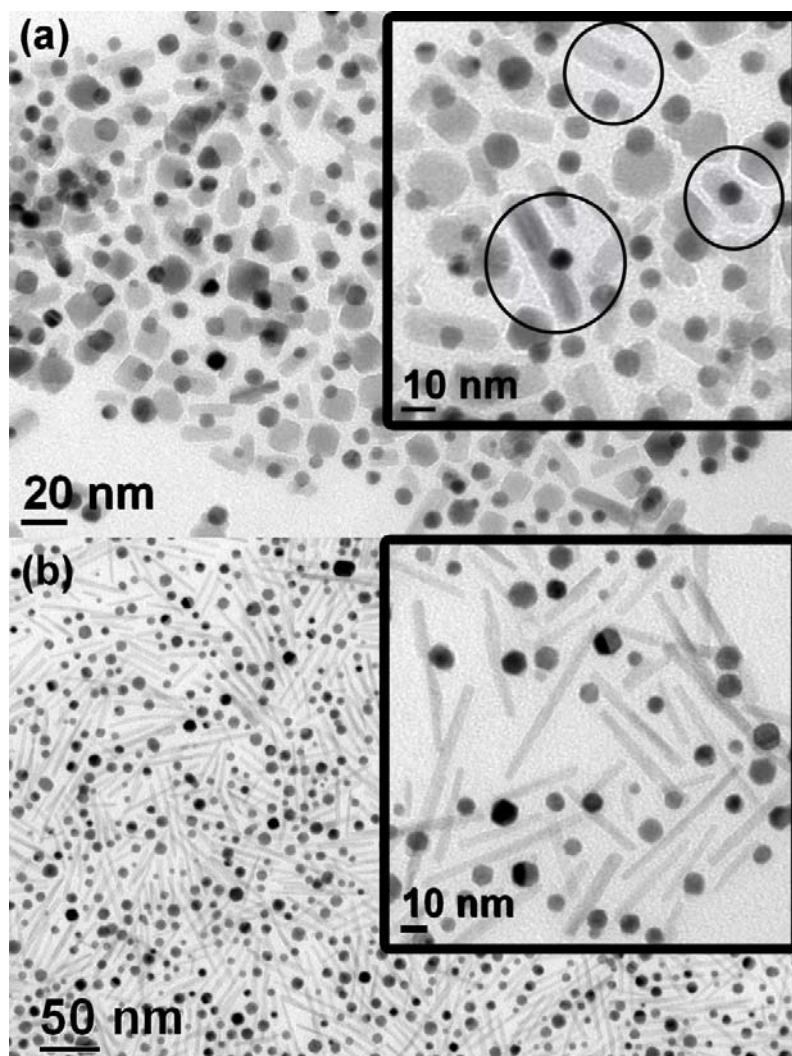

**Figure S2.** TEM images showing Au-Fe<sub>x</sub>O<sub>y</sub> HSs synthesized using the following amounts of DDAB: (a) 1.5 mmol and (b) 3 mmol.

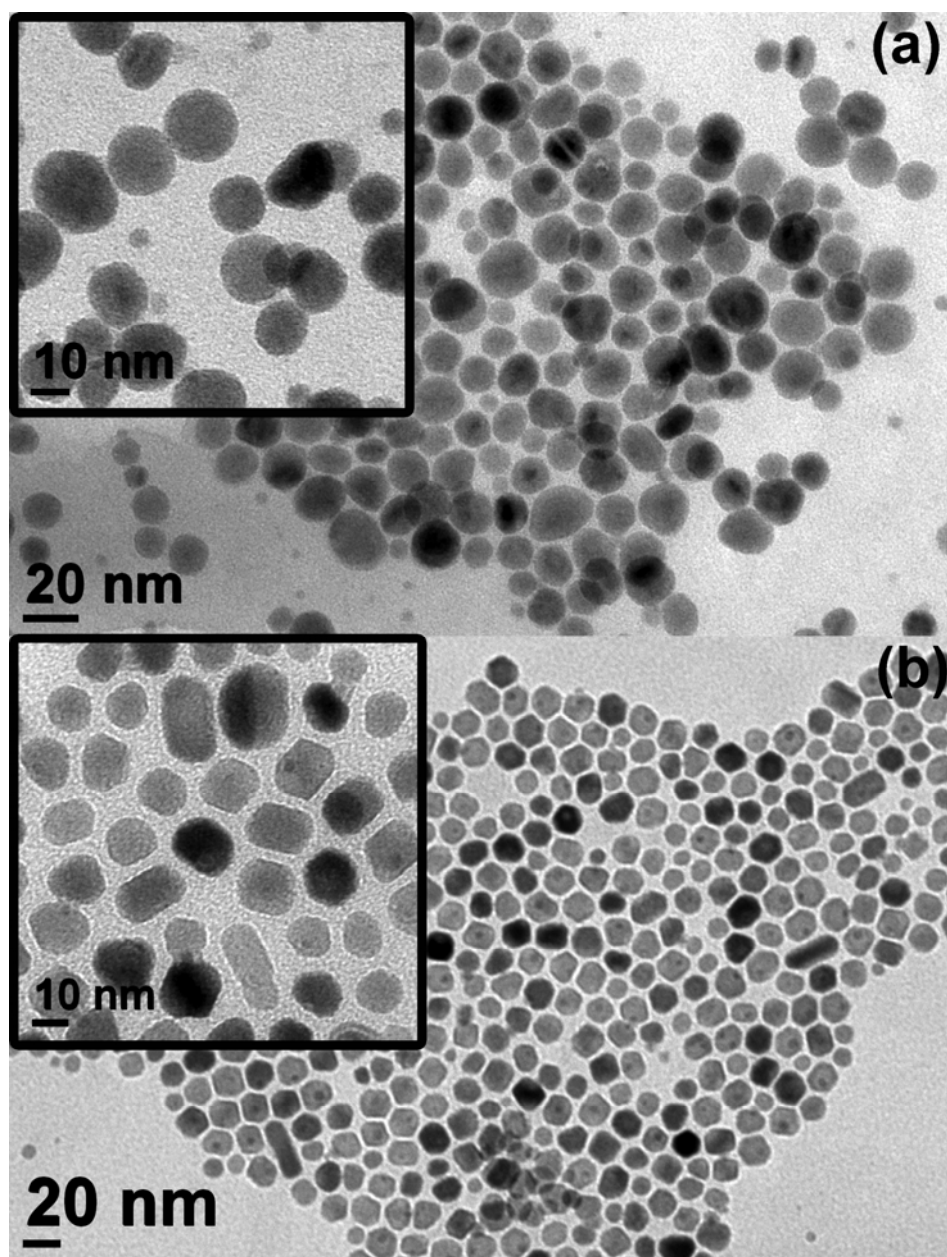

**Figure S3.** **a)** TEM image of roughly spherical iron oxide ( $Fe_xO_y$ ) nanocrystals synthesised without DDAB, but using only oleylamine and oleic acid as surfactants. The inset shows a magnified view of a few nanocrystals. **b)** TEM image of ( $Fe_xO_y$ ) non-spherical oxide ( $Fe_xO_y$ ) nanocrystals synthesized under the same conditions as for the sample shown in a) except for the additional presence of DDAB. Also, the conditions were the same as for the synthesis of the Au- $Fe_xO_y$  HSs discussed in the main paper, except for the absence of the Au nanocrystals in the reaction environment. The inset shows a magnified view of a few nanocrystals.



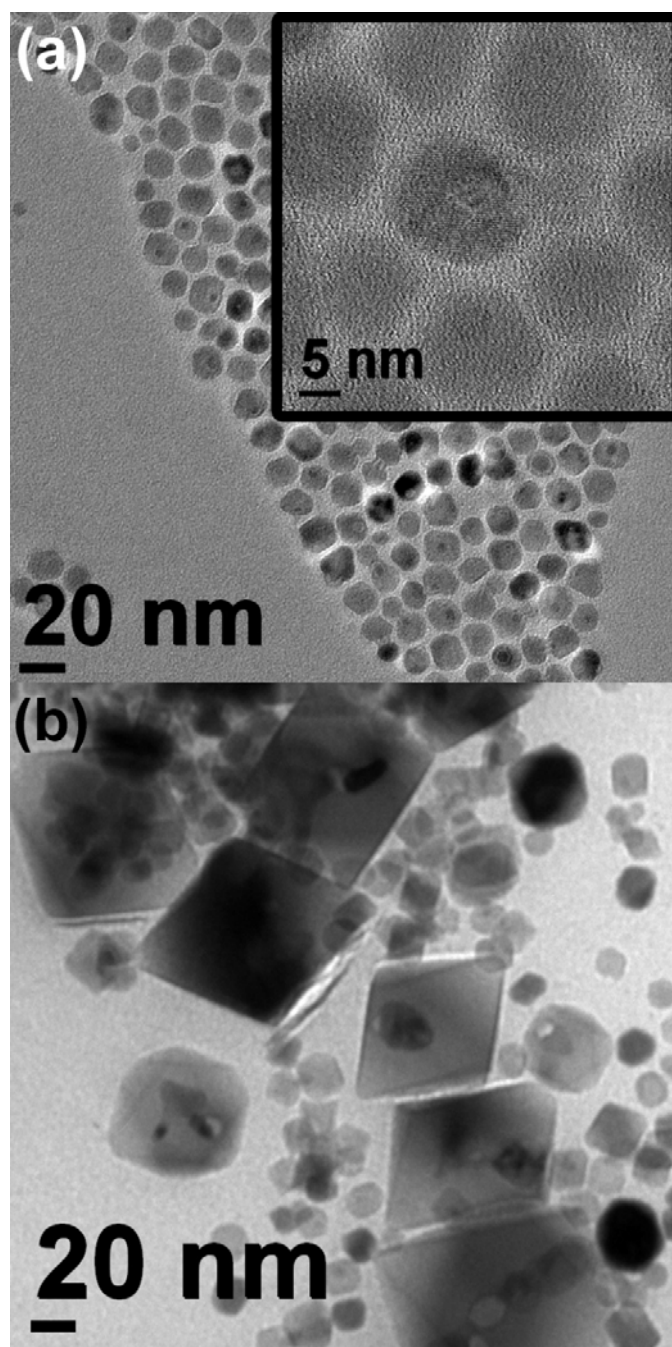

**Figure S4.** *a*) Large area view and HRTEM (inset) of iron oxide ( $Fe_xO_y$ ) nanocrystals synthesised in the presence of DDAB. *b*) TEM image of iron oxide ( $Fe_xO_y$ ) nanocrystals synthesised in the presence of DDAB and using large amounts of iron pentacarbonyl. Two aspects are relevant here: *i*. The presence of DDAB induces strong faceting; *ii*) the particles exhibit a hollow region, most likely due to presence of an initial metallic Fe nucleus, which eventually was converted to iron oxide via the Kirkendall effect.

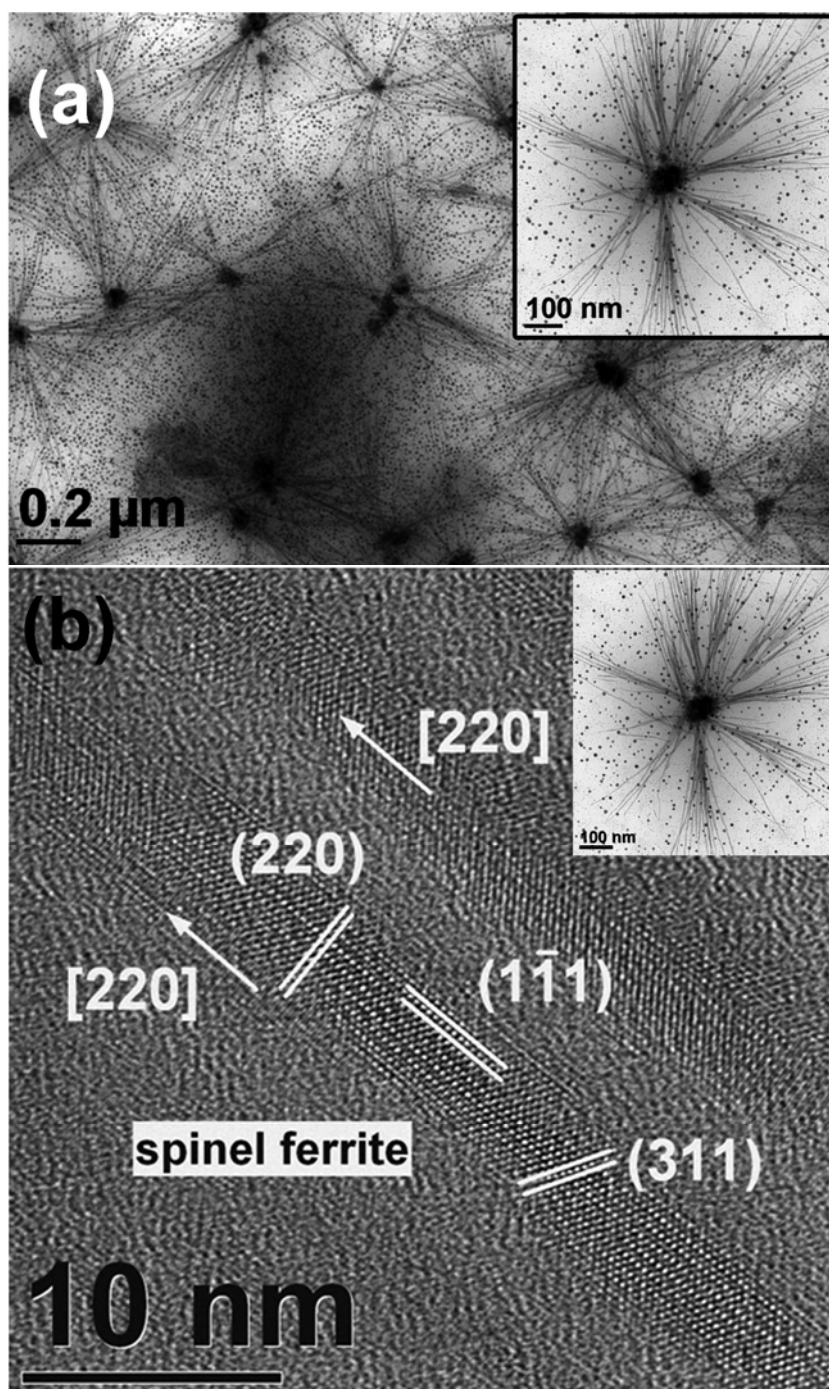

**Figure S5.** *a*) TEM images showing the growth of iron oxide ( $Fe_xO_y$ ) on gold seeds (Au) at higher concentration of DDAB, yielding urchin-like structures with branches of hundreds of nm in length and widths of 5-6 nm; *b*) HRTEM images of two almost parallel branches departing from an urchin structure (inset). Also in these branches the preferential growth direction is the [2 2 0] one.

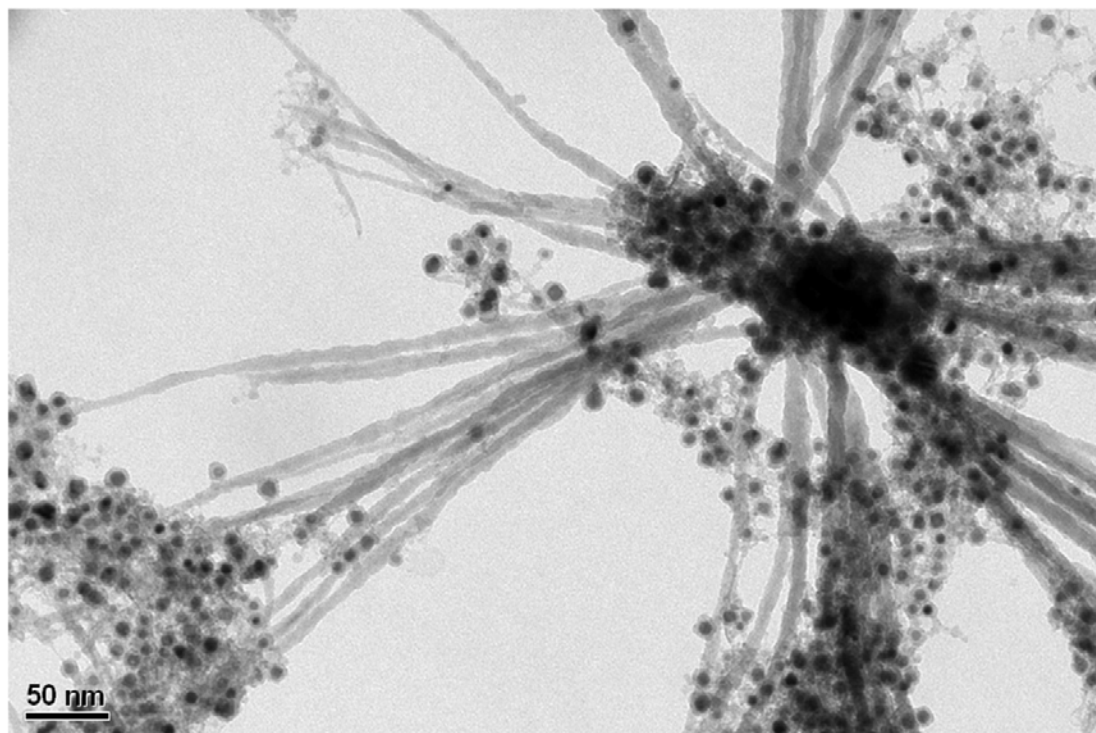

**Figure S6.** TEM images showing the urchin like Au-(Fe<sub>x</sub>O<sub>y</sub>) structures after exposure to iodine (I<sub>2</sub>). In this case not all the Au nanoparticles could be leached out, because most of them were covered by a thick iron oxide shell.



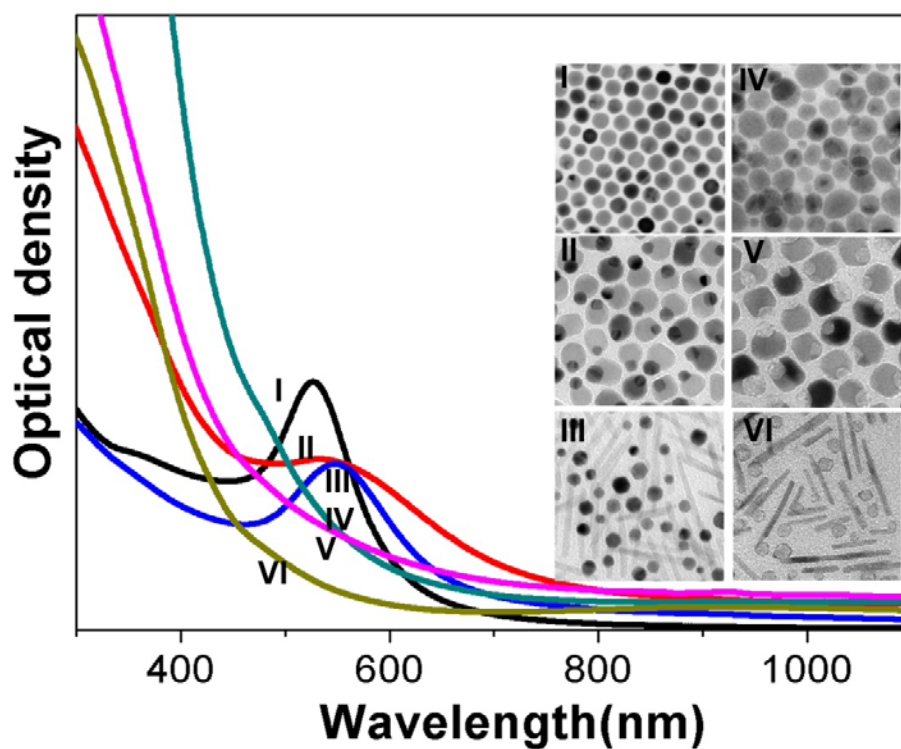

**Figure S7.** UV-VIS-NIR optical absorption spectra of: I) spherical gold nanocrystal seeds; II) Au-Fe<sub>x</sub>O<sub>y</sub> dumbbells; III) Au-Fe<sub>x</sub>O<sub>y</sub> HSs; IV) Fe<sub>x</sub>O<sub>y</sub> nanocrystals; V) nanocrystals obtained after leaching Au from the Au-Fe<sub>x</sub>O<sub>y</sub> dumbbells; VI) Fe<sub>x</sub>O<sub>y</sub> HSs obtained after leaching Au from the Au-Fe<sub>x</sub>O<sub>y</sub> HSs.



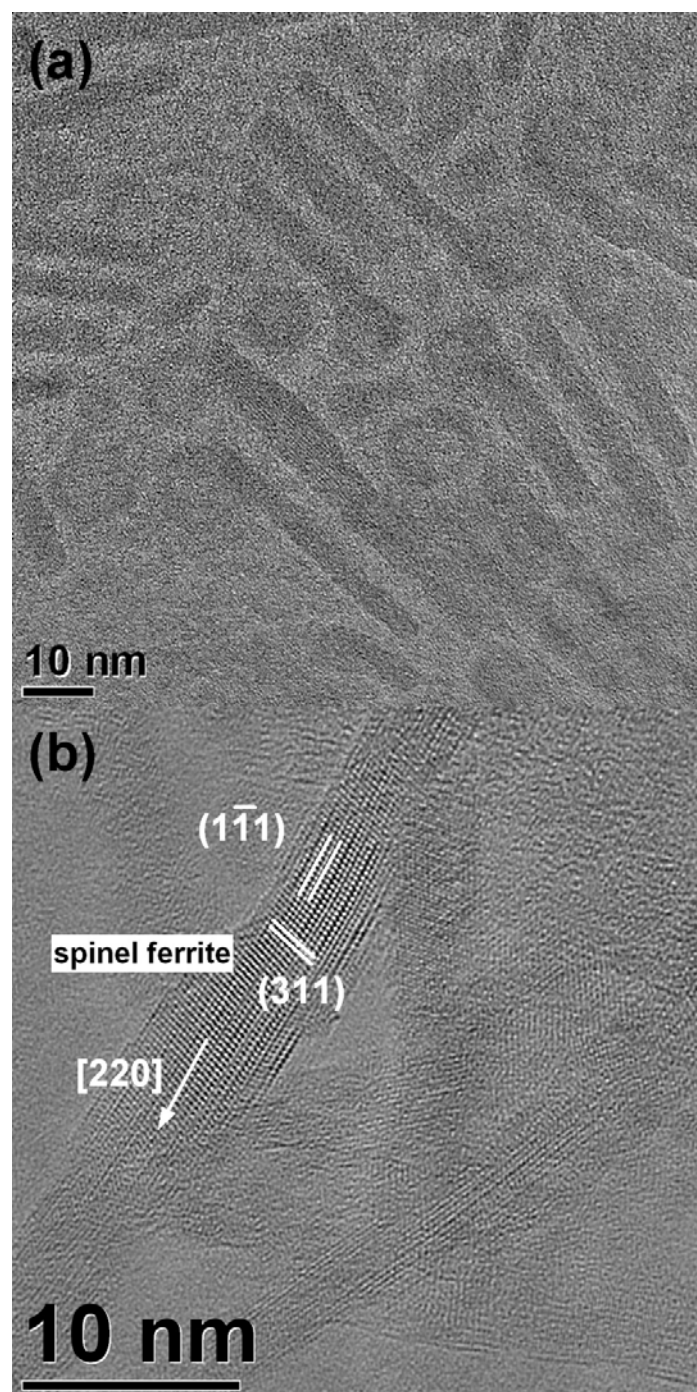

**Figure S8.** (a-b) HRTEM images of the  $Fe_xO_y$  HSs obtained after leaching Au from the Au- $Fe_xO_y$  HSs.

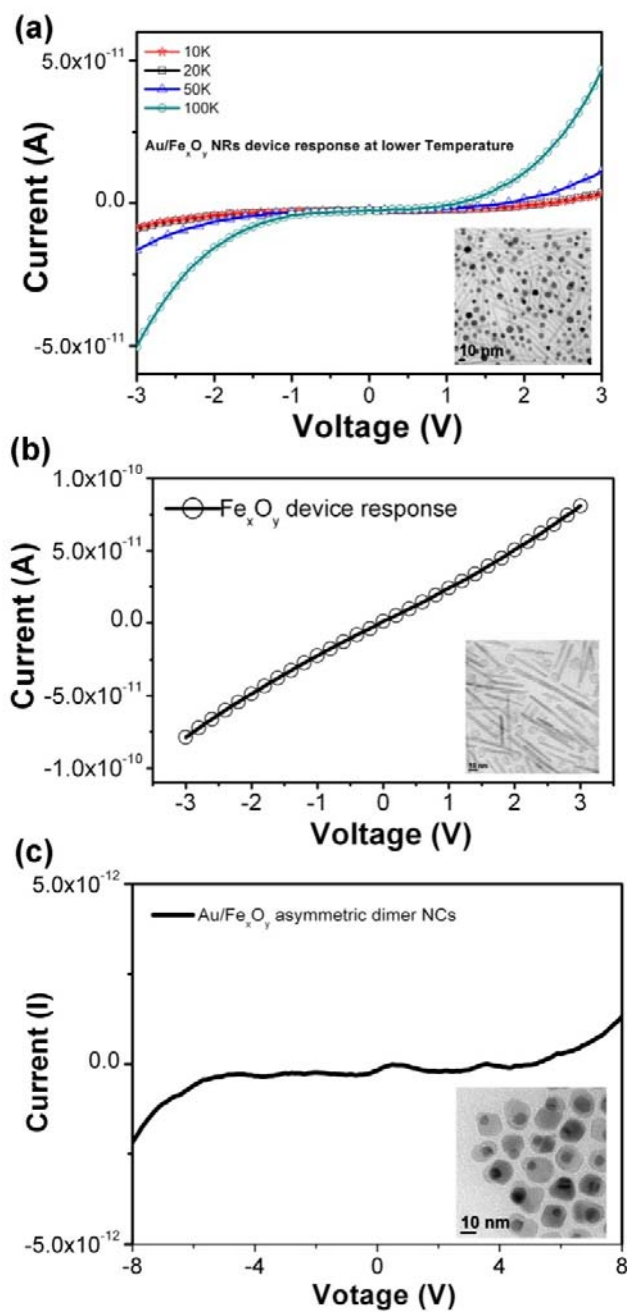

**Figure S9.** I-V characteristics of films made of: **a)** Au-Fe<sub>x</sub>O<sub>y</sub> HSs at various temperatures; **b)** Fe<sub>x</sub>O<sub>y</sub> HSs obtained after leaching Au from the Au-Fe<sub>x</sub>O<sub>y</sub> HSs; **c)** Au-Fe<sub>x</sub>O<sub>y</sub> dumbbells.

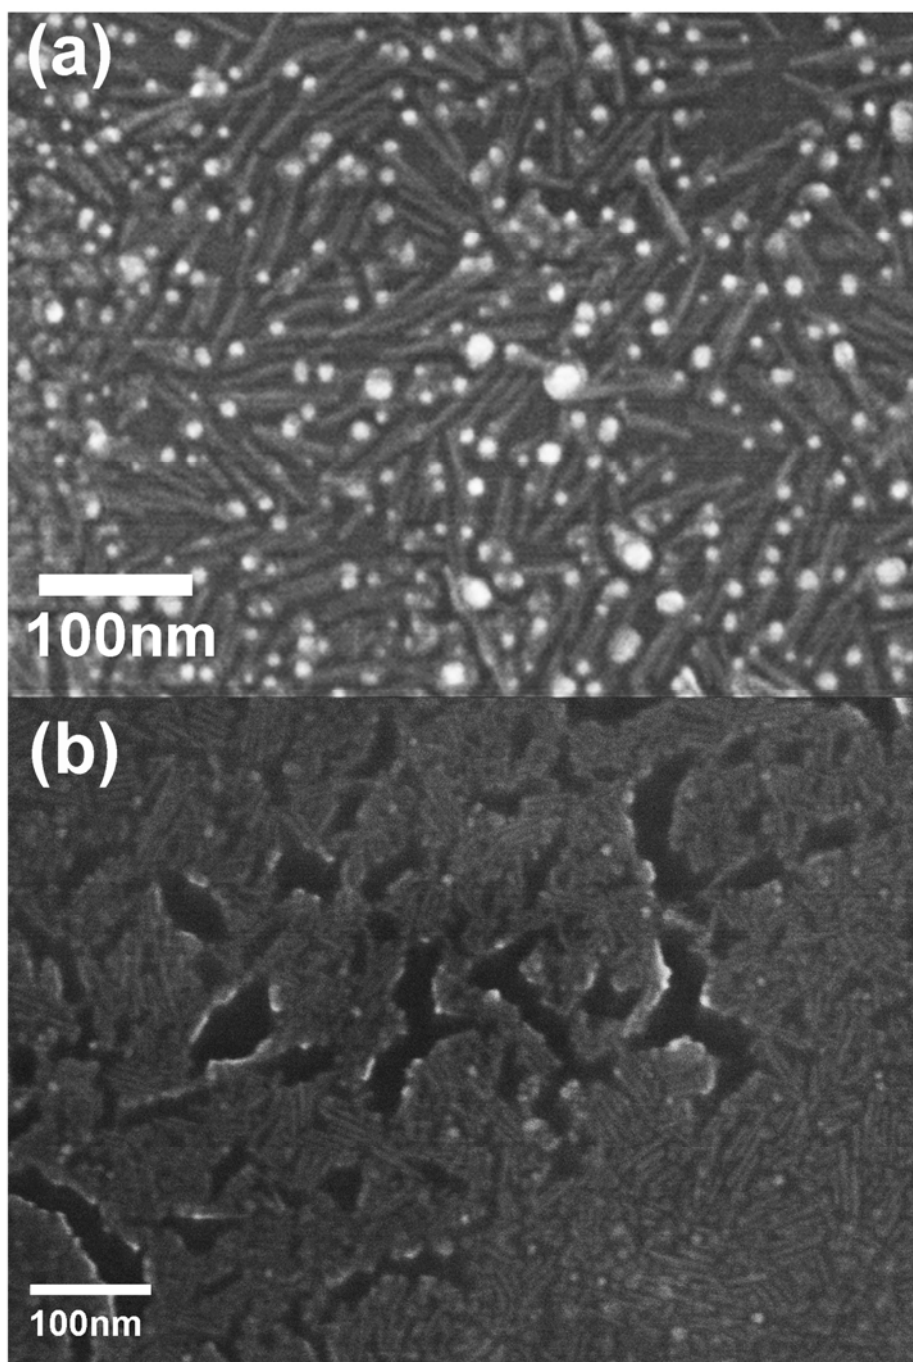

**Figure S10.** Scanning electron microscopy (SEM) images of: a) Au-Fe<sub>x</sub>O<sub>y</sub> HSs drop-cast onto a silicon substrate; b) Fe<sub>x</sub>O<sub>y</sub> HSs obtained after leaching Au from the Au-Fe<sub>x</sub>O<sub>y</sub> HSs, also drop-cast onto a silicon substrate.



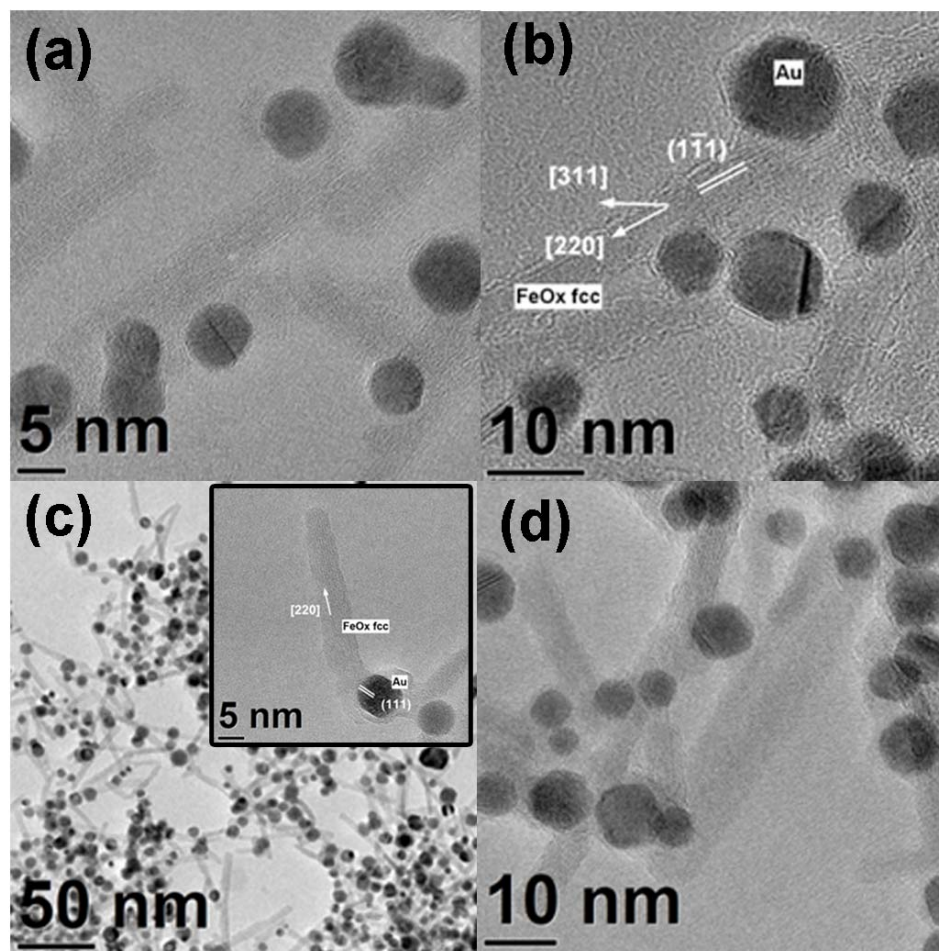

**Figure S11.** a) TEM image of as-prepared Au-Fe<sub>x</sub>O<sub>y</sub> HSs sample; b) Au-Fe<sub>x</sub>O<sub>y</sub> HSs sample annealed at 200 °C for 15 min; c) Au-Fe<sub>x</sub>O<sub>y</sub> HSs treated with hydrazine, retaining the original Au-Fe<sub>x</sub>O<sub>y</sub> interfacial relationship after hydrazine treatment. d) Au-Fe<sub>x</sub>O<sub>y</sub> HSs treated with hydrazine and annealed at 200 °C for 15 mins, showing that the samples remained stable.



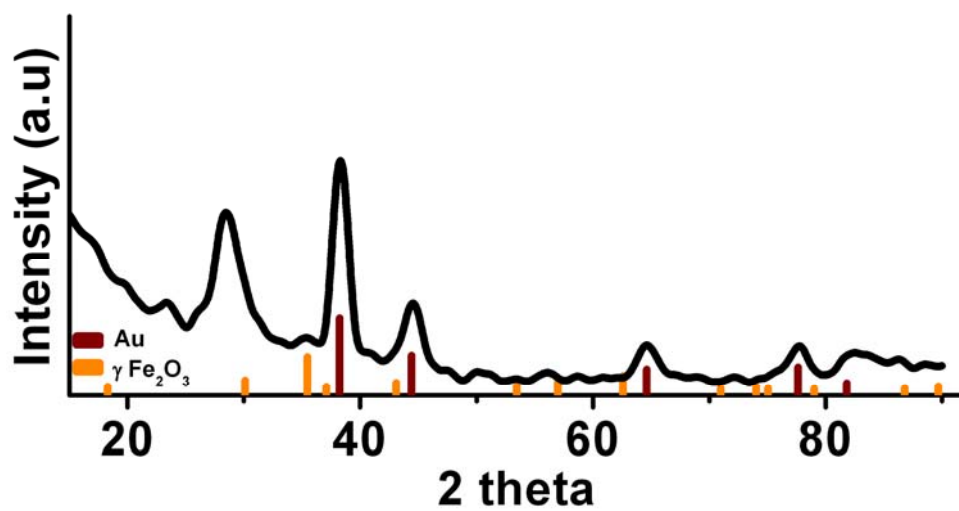

*Figure S12.* X-ray diffraction (XRD) pattern of a typical sample of Au-  $Fe_xO_y$  HSs.
